# Supplementary material
Source: Springer Nature journal article supplement (https://www.springermedizin.de/resource/supplementary/12936_2008_810_MOESM6_ESM.pdf/9548976)

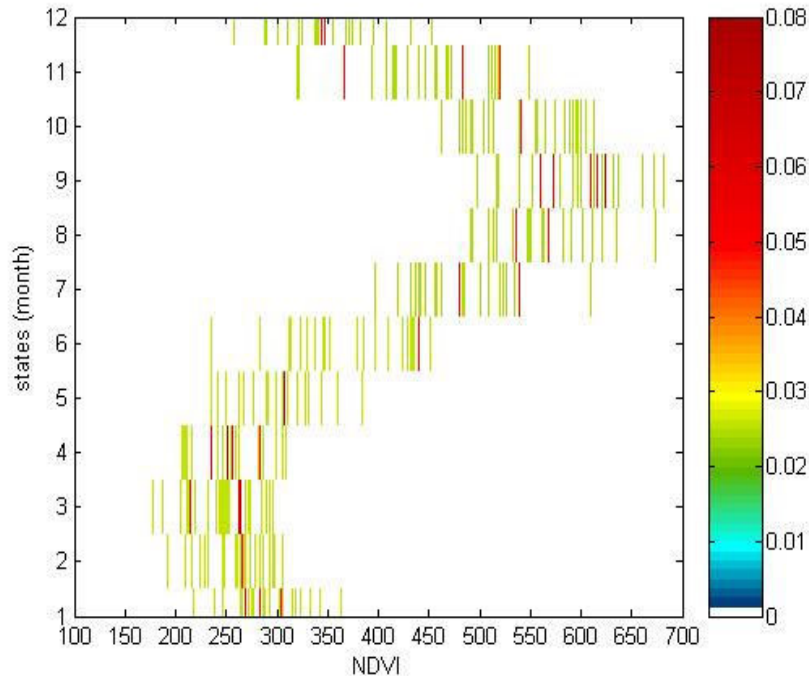

Supplement: MOESM6 [file 9548976]
